# Supplementary material for: Ordered intermetallic PtFe@Pt core–shell nanoparticles supported on carbon nanotubes with superior activity and durability as oxygen reduction reaction electrocatalysts
Source: Royal Society of Chemistry journal article supplement (doi:10.1039/c5ra12291k), 2015-01-01
Supplement: c5ra12291k1.pdf [file c5ra12291k1.pdf]

## Supplementary information

### **Ordered intermetallic PtFe@Pt core-shell nanoparticles supported on the carbon nanotubes with superior activity and durability as oxygen reduction reaction electrocatalysts**

Haijing Liu, Meiling Dou, Feng Wang,\* Jingjun Liu, Jing Ji and Zhilin Li

State Key Laboratory of Chemical Resource Engineering, Beijing Key Laboratory of Electrochemical Process and Technology for Materials, Beijing University of Chemical Technology, Beijing 100029, P R China

#### **Experimental**

**Sample preparation.** The ordered intermetallic PtFe@Pt/CNT electrocatalyst was synthesized by a modified NaBH<sub>4</sub>-reduction method followed by heat-treatment under Ar atmosphere. Multi-walled carbon nanotubes (CNTs) as the support material were firstly refluxed in mixed solution of high concentrated H<sub>2</sub>SO<sub>4</sub> and HNO<sub>3</sub> (volume ratio of 3:1) at 70 °C for 6 hours. The resulting product was filtered and rinsed with deionized water for several times. In a typical synthesis of CNTs supported PtFe alloy nanoparticles, 50 mg of CNTs was dispersed in 100 mL ethylene glycol containing 33.0 mg of H<sub>2</sub>PtCl<sub>6</sub>•6H<sub>2</sub>O with sonication for 30 min. Another 50 mL ethylene glycol dissolved with 11.5 mg of Fe(NO<sub>3</sub>)<sub>2</sub> were gradually added to the above suspension and stirred for 30 min. The mixture was heated to 80 °C under continuously stirring, and then excessive NaBH<sub>4</sub> aqueous (0.1 mol/L) solution was added in droplets. After being kept at 80 °C for another 3 hours, the resulting sample was collected by filtering

and rinsed by ethanol for several times, followed by drying at 80 °C in vacuum oven for 24 hours. The as-prepared CNTs supported PtFe alloy nanoparticles were annealed at 350 °C and 650 °C for 2 hours, and finally cooled to room temperature under Ar atmosphere. Commercial Pt/C electrocatalysts (Hispec3000, Johnson Matthey, loading rate: 20 wt.%) was applied as one of the reference samples.

**Characterization.** The TEM was conducted using JEOL JSM-2100 microscopy with an acceleration voltage of 200 kV. The HAADF-SEM images and EDX elemental analysis were taken on a JEOL JEM-ARM200F microscopy. Powder XRD measurement was carried out on Rigaku D/max-2500 with a Cu K $\alpha$  ( $\lambda$ =1.54 Å). Determination of the elements amount was performed by means of ICP-MS (ICPS-7500, Shimadzu).

**Electrochemical measurements.** Electrochemical measurements were carried out using a conventional three-electrode cell at room temperature with an AUTOLAB PGSTAT302N electrochemical workstation. Pt foil was served as the counter electrode, and a saturated calomel electrode (SCE) was used as reference electrode. The working electrode was prepared by mixing 5 mg electrocatalysts with 50  $\mu$ L nafion solution (5 wt %, DuPont USA) in 1 mL ethanol by sonication. A measured value (10  $\mu$ L) of the mixture was casted onto a glassy carbon rotating disk electrode (0.1256 cm<sup>2</sup> geometrical area), and the solvent was evaporated under vacuum. The Pt loading on the electrode is 0.01 mg/cm<sup>2</sup>, and all the potentials are referred to reversible hydrogen electrode (RHE). Cyclic voltammetry was carried out at potential range of 0.02 V to 1.02 V in 0.1 mol/L HClO<sub>4</sub> solution saturated with N<sub>2</sub> at a scan rate

of 50 mV/s. The electrochemical surface area (ECSA) was calculated according to the hydrogen desorption charge between 0.02 V to 0.4 V with the equation:

$$\text{ECSA} = Q_{\text{H}} / ([\text{Pt}] \times 0.21)$$

where [Pt] represents the Pt loading (mg/cm<sup>2</sup>) on the electrode,  $Q_{\text{H}}$  is the charge for  $\text{H}_{\text{upd}}$  adsorption/desorption (mC/cm<sup>2</sup>), and 0.21mC represents the charge required to oxidize a monolayer of hydrogen. The polarization curves were recorded in 0.1 mol/L  $\text{HClO}_4$  solution saturated with  $\text{O}_2$  at a scan rate of 5 mV/s under rotating rate of 1225 rpm. The kinetic current was calculated applying the Koutecky-Levich equation:

$$1/i = 1/i_k + 1/(0.62nFCo_2Do_2^{2/3} \nu^{-1/6}\omega^{1/2})$$

where  $i_k$  is the kinetic current density,  $i$  is the measured current density,  $n$  is the number of electrons for the ORR process,  $F$  is the Faraday constant,  $Do_2$  is the diffusion coefficient,  $\nu$  is the kinematic viscosity,  $Co_2$  is the bulk concentration of  $\text{O}_2$ ,  $\omega$  is the rotation rate.

## Figures & Tables

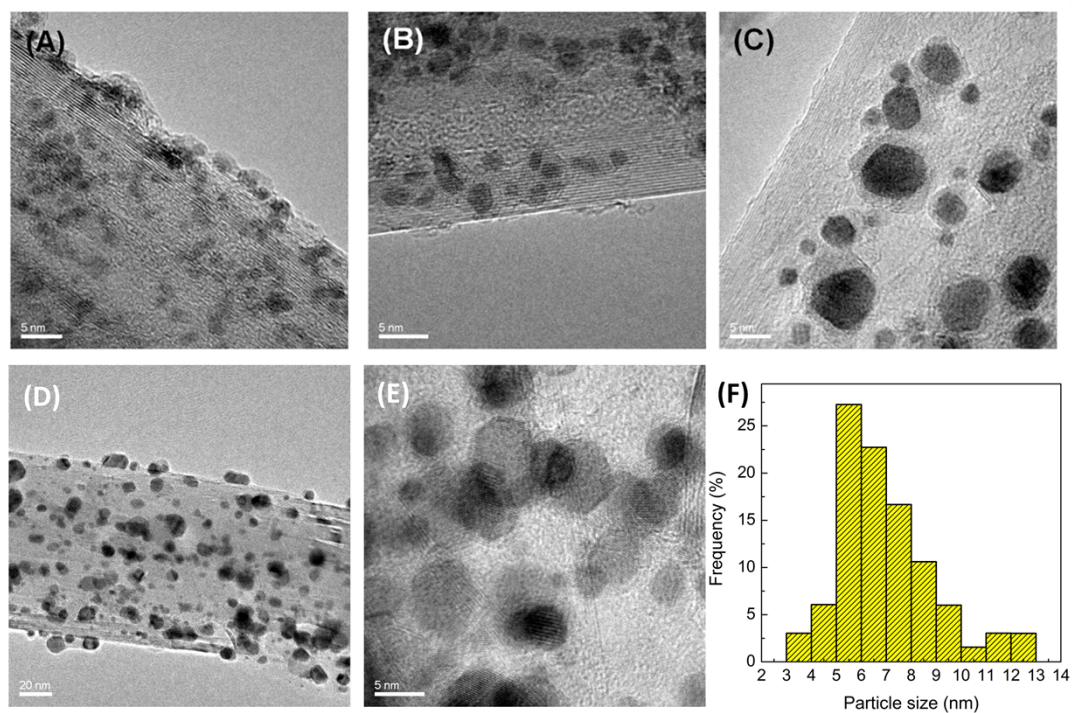

**Fig. S1** TEM images of (A) PtFe/CNT, (B) PtFe/CNT annealed 350 °C, (C) (D) (E) PtFe/CNT annealed at 650 °C and the corresponding particle size distribution graph for PtFe/CNT annealed at 650 °C.

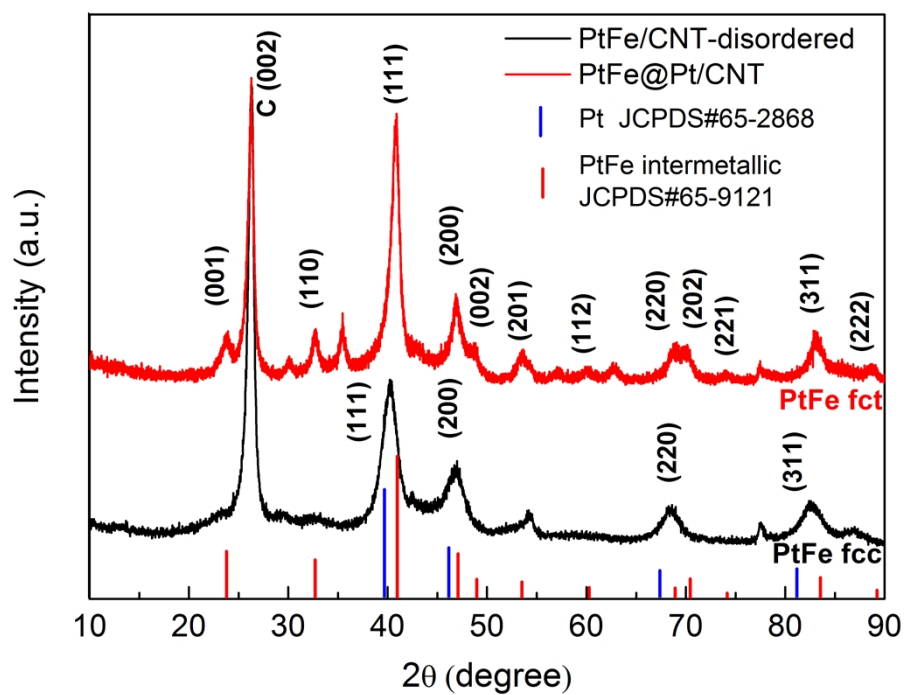

**Fig. S2** XRD patterns of PtFe/CNT-disordered and PtFe@Pt/CNT electrocatalyst

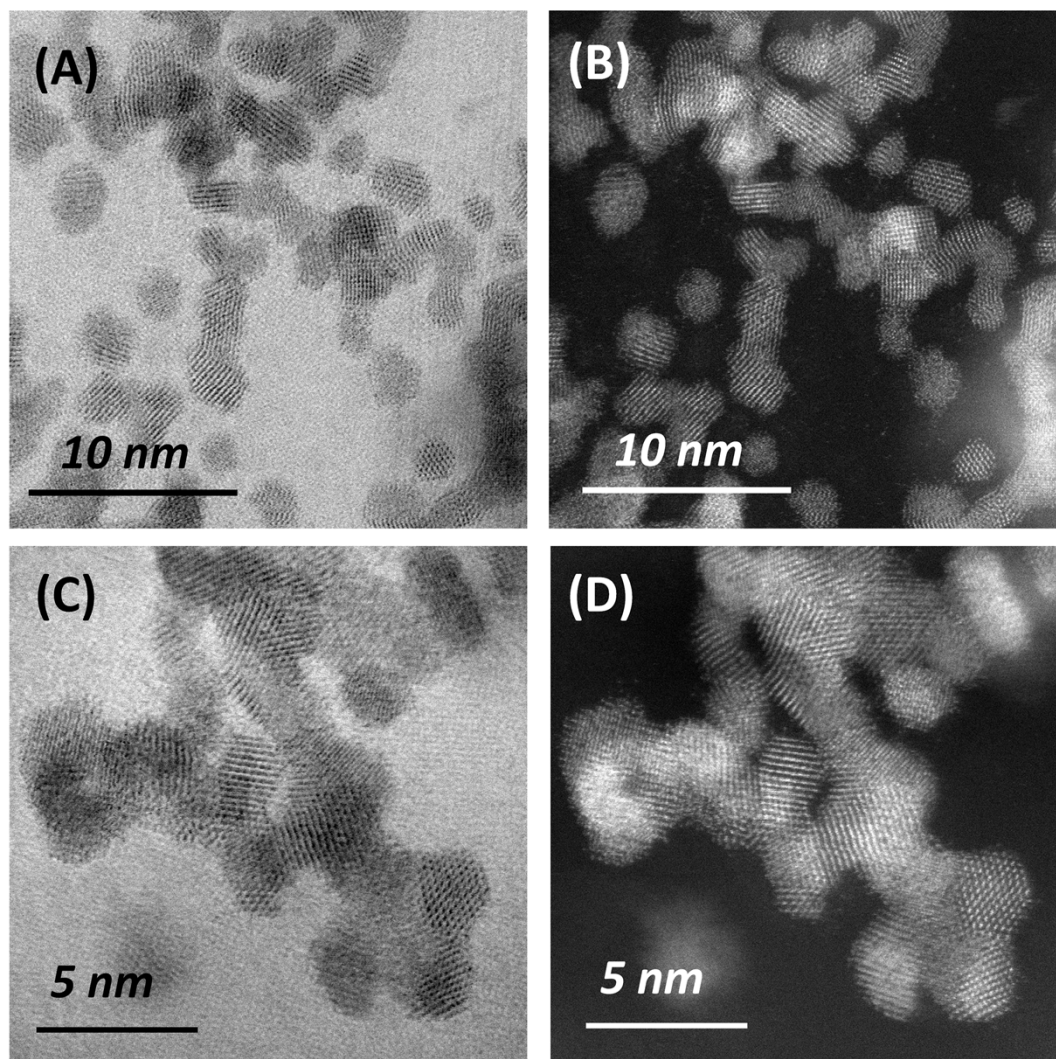

**Fig. S3** High-angle annular-dark-field scanning transmission electron microscope (HAADF-STEM) images of PtFe/CNT annealed at 350 °C (A) (C) Bright-field image (B) (D) annular dark-field image

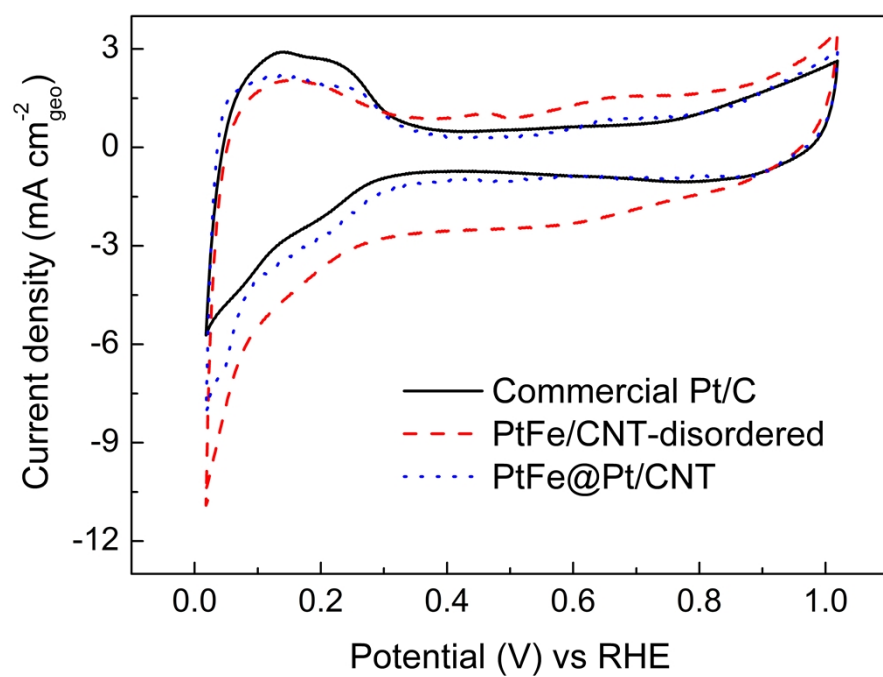

**Fig. S4** Cyclic voltammetry curves of the commercial Pt/C, PtFe/CNT-disordered and PtFe@Pt/CNT electrocatalysts recorded in 0.1 mol/L HClO<sub>4</sub> at sweep rate of 50 mV/s

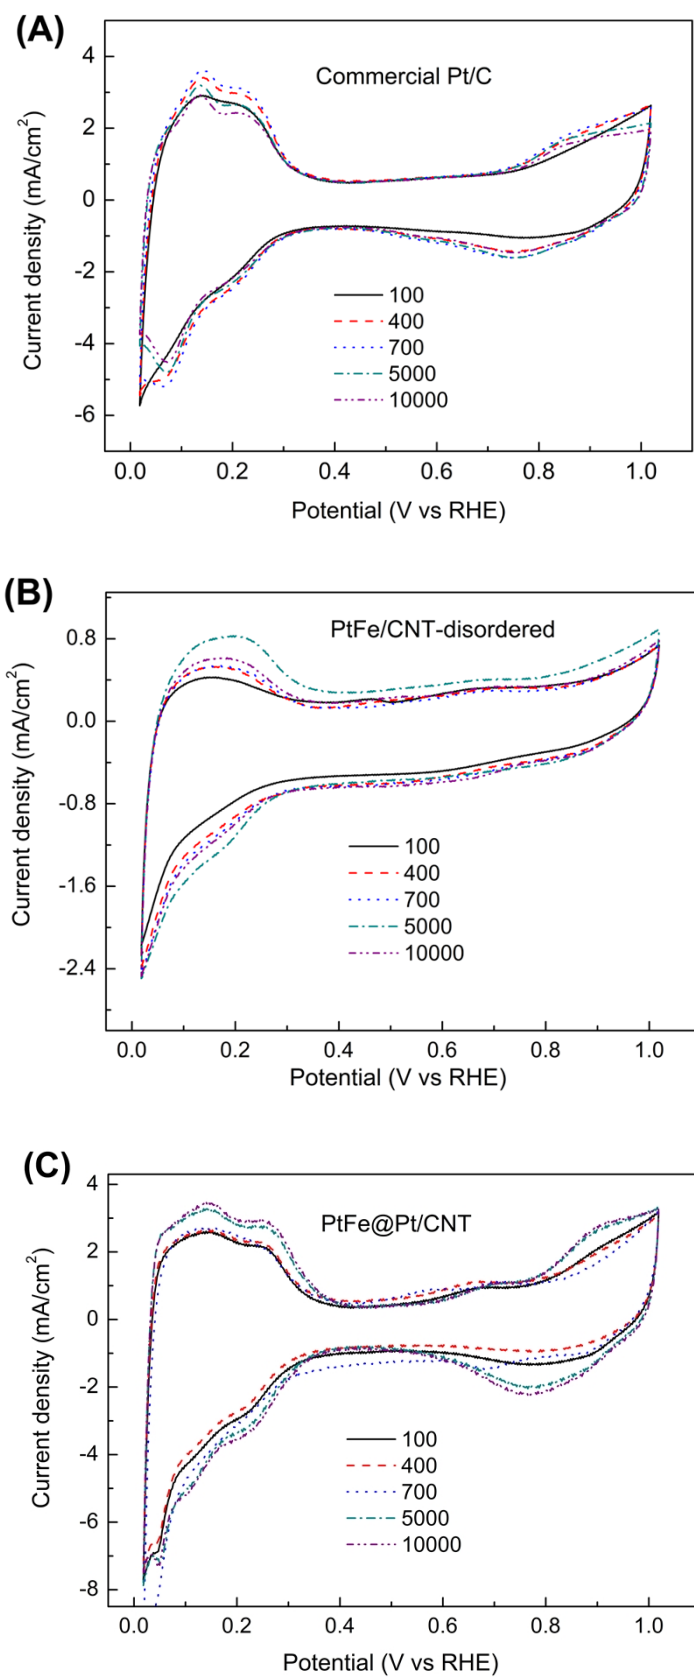

**Fig. S5** Cyclic voltammetry curves of the (A) commercial Pt/C, (B) PtFe/CNT-disordered and (C) PtFe@Pt/CNT electrocatalysts recorded in 0.1 mol/L HClO<sub>4</sub> at sweep rate of 50 mV/s after various numbers of cycles during the stability test.

**Table S1.** Comparison of ECSA, on-set and half-wave potentials measured from the ORR polarization curves

|                     | ECSA (m <sup>2</sup> /g) | E <sub>on-set</sub> (V) | E <sub>half-wave</sub> (V) |
|---------------------|--------------------------|-------------------------|----------------------------|
| Commercial Pt/C     | 61.8                     | 0.996                   | 0.905                      |
| PtFe/CNT-disordered | 46.7                     | 1.002                   | 0.894                      |
| PtFe@Pt/CNT         | 50.3                     | 1.012                   | 0.921                      |

**Table S2.** Comparison of the mass and specific activities of Pt intermetallics

| No. | catalyst                               | MA@0.9 V<br>mA $\mu\text{g}^{-1}\text{Pt}$ | SA@0.9 V<br>mA $\text{cm}^{-2}\text{Pt}$ | Reference  |
|-----|----------------------------------------|--------------------------------------------|------------------------------------------|------------|
| 1   | Pt <sub>1</sub> Fe <sub>1</sub> /C     | 0.15                                       | 0.05                                     | 1          |
| 2   | Pt <sub>3</sub> Fe <sub>1</sub> /C     | 0.105                                      | 0.03                                     | 1          |
| 3   | Pt@Pt <sub>3</sub> Fe <sub>2</sub> /C  | 0.228                                      | 0.155                                    | 2          |
| 4   | PtCo <sub>3</sub> /C                   | 0.23                                       | 0.31                                     | 3          |
| 5   | Pt <sub>3</sub> Ni cubes               | 0.05                                       | 0.5                                      | 4          |
| 6   | D-Pt <sub>3</sub> Cr/C                 | 0.057                                      | 0.076                                    | 5          |
| 7   | O-Pt <sub>3</sub> Cr/C                 | 0.043                                      | 0.012                                    | 5          |
| 8   | Pt <sub>45</sub> Ir <sub>55</sub> -400 | 0.21                                       | 0.45                                     | 6          |
| 9   | Pt <sub>45</sub> Ir <sub>55</sub> -800 | 0.18                                       | 0.51                                     | 6          |
| 10  | CoCuPt                                 | 0.15                                       | 0.37                                     | 7          |
| 11  | PtFe@Pt/CNT                            | 0.308                                      | 0.26                                     | this paper |

## References

1. X. Li, L. An, X. Wang, F. Li, R. Zou and D. Xia, J. Mater. Chem., 2012, 22, 6047–6052.
2. S. Prabhudev, M. Bugnet, C. Bock and G. A. Botton, ACS Nano, 2013, 7, 6103–6110.
3. H. Schulenburg, E. Muller, G. Khelashvili, T. Roser, H. Bonnemmann, A. Wokaun and G. G. Scherer, J. Phys. Chem. C, 2009, 113, 4069–4077.
4. J. Zhang, H. Yang, J. Fang and S. Zou, Nano Lett., 2010, 10, 638–644.

5. L. Zou, J. Li, T. Yuan, Y. Zhou, X. Li and H. Yang, *Nanoscale*, 2014, 6, 10686–10692.
6. R. Loukrakpam, S. Shan, V. Petkov, L. Yang, J. Luo and C. Zhong, *J. Phys. Chem. C*, 2013, 117, 20715–20721.
7. J. B. Wu, Z. M. Peng, and H. Yang, *Phil. Trans. R. Soc.A*, 2010, 368, 4261–4274.
